# Supplementary material
Source: Research Square preprint supplement (doi:10.21203/rs.3.rs-8822329/v1)
Supplement: Supplementary file 1 [file 16895888b2157cfd7763668e.docx]

**Supplementary Table 1. *B. anthracis* unique pathways. All these pathways lack homologous pathways in *Homo sapiens*.**

| **Sl. No.** | **Pathway Id** | **Pathway** | **No. of proteins** |
| --- | --- | --- | --- |
| 1 | 01110 | Biosynthesis of secondary metabolites | 34 |
| 2 | 01120 | Microbial metabolism in diverse environments | 18 |
| 3 | 02020 | Two-component system | 11 |
| 4 | 02024 | Quorum sensing | 9 |
| 5 | 00550 | Peptidoglycan biosynthesis | 8 |
| 6 | 04112 | Cell cycle - *Caulobacter* | 5 |
| 7 | 03070 | Bacterial secretion system | 4 |
| 8 | 01501 | beta-Lactam resistance | 4 |
| 9 | 00720 | Other carbon fixation pathways | 4 |
| 10 | 02060 | Phosphotransferase system (PTS) | 4 |
| 11 | 02040 | Flagellar assembly | 3 |
| 12 | 00300 | Lysine biosynthesis | 3 |
| 13 | 00680 | Methane metabolism | 3 |
| 14 | 02030 | Bacterial chemotaxis | 2 |
| 15 | 01053 | Biosynthesis of siderophore group nonribosomal peptides | 2 |
| 16 | 00710 | Carbon fixation by Calvin cycle | 2 |
| 17 | 01503 | Cationic antimicrobial peptide (CAMP) resistance | 2 |
| 18 | 00261 | Monobactam biosynthesis | 2 |
| 19 | 00552 | Teichoic acid biosynthesis | 2 |
| 20 | 01502 | Vancomycin resistance | 2 |
| 21 | 02026 | Biofilm formation - *Escherichia coli* | 1 |
| 22 | 05111 | Biofilm formation - *Vibrio cholerae* | 1 |
| 23 | 00998 | Biosynthesis of various antibiotics | 1 |
| 24 | 00999 | Biosynthesis of various plant secondary metabolites | 1 |
| 25 | 01310 | Nitrogen cycle | 1 |
| 26 | 00195 | Photosynthesis | 1 |

**Supplementary Table 2. Summary of druggability and binding pocket prediction performed for potential drug target candidates identified in *Bacillus anthracis* through core proteome subtractive genomics approach.**

| **Sl. No.** | **Protein** | **Pocket** | **Volume** | **Surface** | **Depth** | **Drug score** |
| --- | --- | --- | --- | --- | --- | --- |
| 1 | A0A6H3AA11 | 1 | 993.73 | 1084.54 | 29.33 | 0.809136 |
| 2 | 200.64 | 405.08 | 13.82 | 0.505859 |
| 3 | 172.35 | 299.78 | 9.37 | 0.317567 |
| 4 | 148.22 | 363.24 | 9.02 | 0.308006 |
| 5 | 136.38 | 221.06 | 13.05 | 0.442158 |
| 6 | 101.12 | 262.05 | 5.92 | 0.123937 |
| 2 | A0A0F7RBP5 | 1 | 730.59 | 718.22 | 23.67 | 0.853542 |
| 2 | 469.72 | 881.46 | 21.08 | 0.823525 |
| 3 | 428.32 | 831.28 | 14.95 | 0.692001 |
| 4 | 212.33 | 404.08 | 9.72 | 0.382842 |
| 5 | 183.45 | 279.46 | 8.76 | 0.318186 |
| 6 | 170.38 | 390.64 | 9.24 | 0.291125 |
| 7 | 144.88 | 420.88 | 10.51 | 0.334688 |
| 8 | 125.95 | 228.77 | 12.81 | 0.415679 |
| 9 | 118.19 | 250.66 | 7.99 | 0.231903 |
| 10 | 110.14 | 227.9 | 8.17 | 0.231533 |
| 11 | 104.2 | 236.25 | 6.93 | 0.185667 |
| 12 | 103.93 | 322.58 | 9.98 | 0.27434 |
| 3 | A0A2B8IUQ1 | 1 | 580.42 | 877.54 | 14.76 | 0.705543 |
| 2 | 369.02 | 525.84 | 15.25 | 0.671981 |
| 3 | 232.32 | 299.87 | 12.59 | 0.5 |
| 4 | 200.58 | 403.6 | 9.23 | 0.351037 |
| 5 | 194.94 | 284.64 | 10.59 | 0.397833 |
| 6 | 180.03 | 335.23 | 9.58 | 0.329614 |
| 7 | 165.5 | 350.12 | 7.65 | 0.174362 |
| 8 | 156.48 | 316.52 | 8.48 | 0.25499 |
| 9 | 135.87 | 340 | 6.89 | 0.180915 |
| 10 | 127.68 | 211.11 | 13.29 | 0.42418 |
| 11 | 114.69 | 260.26 | 9.17 | 0.257836 |
| 4 | A0A3P1U616 | 1 | 440.29 | 763.37 | 20.31 | 0.807485 |
| 2 | 312.43 | 668.46 | 16.84 | 0.699687 |
| 3 | 247.47 | 329.28 | 14.07 | 0.571494 |
| 4 | 244.38 | 320.82 | 14.92 | 0.586656 |
| 5 | 232.01 | 456.6 | 14.5 | 0.578489 |
| 6 | 189.73 | 438.11 | 14.61 | 0.554186 |
| 7 | 188.7 | 315.51 | 16.2 | 0.605298 |
| 8 | 176.32 | 456.12 | 14.92 | 0.538911 |
| 9 | 175.29 | 494.72 | 9.37 | 0.302496 |
| 10 | 175.29 | 304.23 | 10.97 | 0.385956 |
| 11 | 158.79 | 474.81 | 12.5 | 0.430995 |
| 12 | 149.51 | 347.08 | 13.52 | 0.441891 |
| 13 | 139.2 | 196.01 | 10.15 | 0.348117 |
| 14 | 136.11 | 328.31 | 11.69 | 0.370116 |
| 15 | 136.11 | 326.83 | 10.6 | 0.356493 |
| 5 | A0A6L7H5P4 | 1 | 1339.91 | 2009.41 | 18.41 | 0.821104 |
| 2 | 800.65 | 1504.98 | 21.85 | 0.847067 |
| 3 | 279.16 | 596.2 | 15.6 | 0.646456 |
| 4 | 251.09 | 377.01 | 8.15 | 0.379168 |
| 5 | 197.09 | 458.58 | 8.84 | 0.33321 |
| 6 | 165.85 | 406.54 | 10.63 | 0.382789 |
| 7 | 116.14 | 265.21 | 8.09 | 0.257885 |
| 6 | A0A6L7HGT9 | 1 | 2356.88 | 3249.76 | 35.63 | 0.808203 |
| 2 | 1672.87 | 1625.75 | 34.89 | 0.801983 |
| 3 | 355.5 | 559.15 | 11.67 | 0.571776 |
| 4 | 302.59 | 556.31 | 12.83 | 0.527492 |
| 5 | 241.81 | 501.75 | 16.44 | 0.64789 |
| 6 | 173.54 | 315.68 | 8.15 | 0.267318 |
| 7 | 138.94 | 328.26 | 7.46 | 0.23568 |
| 8 | 131.19 | 241.54 | 8.75 | 0.281871 |
| 9 | 114.89 | 220.45 | 9.06 | 0.249406 |
| 10 | 109.95 | 162.99 | 7.53 | 0.229281 |
| 7 | A0A6L8P516 | 1 | 942.18 | 1053.72 | 17.98 | 0.79629 |
| 2 | 630.92 | 645.53 | 19.13 | 0.824181 |
| 3 | 537.91 | 778.84 | 18.43 | 0.806106 |
| 4 | 532.39 | 978.68 | 16.49 | 0.769185 |
| 5 | 347.71 | 635.59 | 13.81 | 0.591032 |
| 6 | 312.81 | 520.67 | 16.29 | 0.687752 |
| 7 | 298.23 | 515.69 | 14.36 | 0.611666 |
| 8 | 246.09 | 490.52 | 13.04 | 0.532183 |
| 9 | 158.83 | 386.07 | 15.23 | 0.554267 |
| 10 | 147.79 | 363.24 | 13.09 | 0.45288 |
| 11 | 132.1 | 389.82 | 12.21 | 0.355356 |
| 12 | 118.41 | 363.64 | 8.74 | 0.276342 |
| 13 | 115.54 | 326.72 | 7.6 | 0.188863 |
| 14 | 108.02 | 299.27 | 7.57 | 0.160968 |
| 15 | 106.26 | 223.04 | 7.79 | 0.193972 |
| 8 | A0A6L8PPQ8 | 1 | 498.87 | 787.01 | 20.91 | 0.821175 |
| 2 | 356.77 | 861.28 | 19.41 | 0.777088 |
| 3 | 247.93 | 497.64 | 16.31 | 0.623417 |
| 4 | 176.87 | 415.02 | 11.36 | 0.417079 |
| 5 | 160.24 | 384.8 | 12.04 | 0.432841 |
| 6 | 157.22 | 293.61 | 14.29 | 0.505317 |
| 7 | 155.71 | 158.86 | 10.83 | 0.379763 |
| 8 | 142.1 | 284.51 | 8.82 | 0.285073 |
| 9 | 122.45 | 226.55 | 10.33 | 0.308913 |
| 10 | 108.85 | 208.19 | 8.96 | 0.245866 |
| 11 | 104.31 | 338.09 | 10.89 | 0.334343 |
| 12 | 102.8 | 230.08 | 9.94 | 0.28126 |
| 9 | Q81FE6 | 1 | 869.78 | 1382.43 | 21.82 | 0.828926 |
| 2 | 812.78 | 1245.42 | 24.02 | 0.845369 |
| 3 | 693.15 | 1229.83 | 20.76 | 0.834971 |
| 4 | 591.11 | 1144.69 | 20.76 | 0.82097 |
| 5 | 543.96 | 1034.18 | 19.61 | 0.791509 |
| 6 | 341.3 | 720.43 | 17.68 | 0.703492 |
| 7 | 278.67 | 603.95 | 11.73 | 0.485554 |
| 8 | 266.7 | 606.6 | 19.83 | 0.737297 |
| 9 | 232.93 | 479.31 | 9.33 | 0.381123 |
| 10 | 190 | 389.17 | 9.46 | 0.317546 |
| 11 | 185.78 | 469.86 | 12.23 | 0.437216 |
| 12 | 166.07 | 445.2 | 13.25 | 0.463296 |
| 13 | 158.33 | 373.5 | 8.62 | 0.299703 |
| 14 | 156.22 | 315.62 | 15.02 | 0.545218 |
| 15 | 142.85 | 389.38 | 12.23 | 0.323668 |
| 16 | 127.37 | 532.04 | 12.13 | 0.377486 |
| 17 | 117.52 | 322.11 | 10.18 | 0.226947 |
| 18 | 111.89 | 389.88 | 7.65 | 0.174699 |
| 19 | 109.78 | 300.56 | 8.39 | 0.243651 |
| 20 | 109.07 | 491.85 | 8.1 | 0.23348 |
| 21 | 103.44 | 208.02 | 8.1 | 0.235682 |
| 10 | Q81K13 | 1 | 1462.06 | 1629.91 | 27.66 | 0.812953 |
| 2 | 674.56 | 900.31 | 18.47 | 0.802411 |
| 3 | 303.91 | 526.45 | 11.76 | 0.530062 |
| 4 | 277.47 | 340.54 | 16.45 | 0.66851 |
| 5 | 270.1 | 410.87 | 11.01 | 0.474851 |
| 6 | 207.52 | 324.35 | 13.64 | 0.528646 |
| 7 | 119.27 | 410.41 | 8.92 | 0.23423 |
| 8 | 107.14 | 290.33 | 9.5 | 0.268708 |
| 9 | 105.66 | 272.02 | 6.65 | 0.172276 |
| 10 | 105.32 | 261.31 | 12.43 | 0.391686 |
| 11 | Q81K75 | 1 | 979.8 | 1238.61 | 18.33 | 0.801681 |
| 2 | 691.01 | 1016.68 | 17.69 | 0.805388 |
| 3 | 405.42 | 787.35 | 17.33 | 0.728149 |
| 4 | 402.01 | 611.62 | 17.18 | 0.748362 |
| 5 | 299.08 | 211.93 | 15.09 | 0.646851 |
| 6 | 189.32 | 276.52 | 14.11 | 0.5153 |
| 7 | 158.33 | 357.53 | 13.37 | 0.428819 |
| 8 | 154.31 | 320.37 | 10.48 | 0.284774 |
| 9 | 130.73 | 214.84 | 7.87 | 0.24268 |
| 10 | 122.56 | 204.14 | 11.49 | 0.367989 |
| 11 | 119.09 | 240.91 | 9.66 | 0.284432 |
| 12 | 115.75 | 287.56 | 7.6 | 0.238661 |
| 12 | Q81KQ2 | 1 | 2226.82 | 2302.16 | 34.08 | 0.799182 |
| 2 | 241.34 | 367.84 | 7.87 | 0.295029 |
| 3 | 178.5 | 354.75 | 7.52 | 0.219249 |
| 4 | 137.34 | 287.16 | 15.28 | 0.5 |
| 5 | 114.88 | 258.1 | 10.1 | 0.309442 |
| 6 | 106.56 | 209.91 | 6.56 | 0.178295 |
| 13 | Q81MY9 | 1 | 732.35 | 913.52 | 19.12 | 0.823633 |
| 2 | 202.05 | 362.57 | 10.45 | 0.403156 |
| 3 | 201.41 | 493.43 | 13.77 | 0.5 |
| 4 | 174.91 | 299.84 | 9.06 | 0.310439 |
| 5 | 145.92 | 264.86 | 9.67 | 0.296527 |
| 6 | 144.51 | 363.73 | 9.37 | 0.307587 |
| 7 | 125.57 | 267.71 | 7.98 | 0.237112 |
| 8 | 109.63 | 249.02 | 9.3 | 0.28645 |
| 14 | Q81NB9 | 1 | 286.64 | 351.38 | 11.29 | 0.5 |
| 2 | 241.07 | 340.97 | 13.48 | 0.557162 |
| 3 | 206.29 | 442.31 | 15.25 | 0.590674 |
| 4 | 185.9 | 303.92 | 12.84 | 0.489131 |
| 5 | 149.92 | 412.19 | 14.61 | 0.519664 |
| 6 | 129.53 | 161.2 | 10.68 | 0.352164 |
| 7 | 127.13 | 412.1 | 9.14 | 0.295472 |
| 8 | 119.93 | 337.91 | 8.37 | 0.257928 |
| 9 | 112.74 | 342.89 | 9.62 | 0.204807 |
| 10 | 111.54 | 238.72 | 8.63 | 0.232074 |
| 11 | 100.75 | 227.54 | 8.89 | 0.232816 |
| 15 | Q81WC9 | 1 | 1576.58 | 1742.19 | 35.89 | 0.802929 |
| 2 | 367.62 | 606.4 | 16.71 | 0.711041 |
| 3 | 230.91 | 356.38 | 10.59 | 0.434663 |
| 4 | 208.58 | 398.38 | 10.19 | 0.370164 |
| 5 | 201.09 | 372.94 | 10.44 | 0.3641 |
| 6 | 173.95 | 369.3 | 9.37 | 0.30156 |
| 7 | 165.7 | 292.44 | 7.09 | 0.226997 |
| 8 | 165.5 | 281.23 | 10.32 | 0.342954 |
| 9 | 156.86 | 287.72 | 12.66 | 0.44365 |
| 10 | 152.7 | 353.97 | 8.25 | 0.266462 |
| 11 | 144.77 | 373.82 | 9.52 | 0.289605 |
| 12 | 123.9 | 316.38 | 7.24 | 0.210823 |
| 13 | 104.19 | 277.89 | 7.31 | 0.204546 |
| 16 | Q81WD2 | 1 | 750.9 | 1167.18 | 25.16 | 0.856617 |
| 2 | 638.42 | 1199.07 | 19.44 | 0.809883 |
| 3 | 439.92 | 687.68 | 15.74 | 0.724532 |
| 4 | 333.44 | 788.16 | 16.56 | 0.690658 |
| 5 | 232.94 | 408.36 | 13.39 | 0.548004 |
| 6 | 192.34 | 494.03 | 10.59 | 0.354292 |
| 7 | 145.25 | 340.24 | 8.01 | 0.250085 |
| 8 | 139.43 | 408.23 | 8.66 | 0.277296 |
| 9 | 133.77 | 296.61 | 9.37 | 0.308876 |
| 10 | 132.28 | 343.99 | 7.87 | 0.216818 |
| 11 | 130.11 | 267.35 | 7.66 | 0.235354 |
| 12 | 123.13 | 195.72 | 13.56 | 0.462483 |
| 13 | 122.13 | 409.29 | 12.55 | 0.391455 |
| 14 | 104.16 | 301.97 | 6.3 | 0.145717 |
| 17 | Q81X77 | 1 | 399.24 | 525.74 | 14.87 | 0.685885 |
| 2 | 325.66 | 578.1 | 17.25 | 0.714287 |
| 3 | 283.63 | 504.7 | 11.46 | 0.5 |
| 4 | 242.94 | 510.95 | 10.47 | 0.356466 |
| 5 | 180.74 | 287.3 | 11.46 | 0.420192 |
| 6 | 180.47 | 81.87 | 16.38 | 0.610581 |
| 7 | 175.85 | 260.42 | 9.37 | 0.32304 |
| 8 | 174.69 | 219.81 | 11.19 | 0.404012 |
| 9 | 153.01 | 259.15 | 7.65 | 0.247486 |
| 10 | 145.01 | 320.45 | 9.07 | 0.289817 |
| 11 | 144.57 | 247.78 | 8.2 | 0.218887 |
| 12 | 134.44 | 207.95 | 7 | 0.217391 |
| 13 | 133.29 | 388.39 | 9.96 | 0.269299 |
| 14 | 130.98 | 310.59 | 6.51 | 0.199939 |
| 15 | 125.02 | 353.8 | 8.31 | 0.240882 |
| 16 | 118.8 | 231.09 | 7.91 | 0.206207 |
| 17 | 111.07 | 303.72 | 6.51 | 0.179967 |
| 18 | 110.72 | 62.47 | 11.46 | 0.354794 |
| 19 | 109.65 | 257.12 | 7.41 | 0.211771 |
| 20 | 103.52 | 164.14 | 6.72 | 0.13321 |
| 21 | 101.39 | 214.5 | 7.83 | 0.204324 |
| 22 | 101.03 | 233.57 | 8.58 | 0.198831 |
